# Supplementary material for: Isoflurane alleviates systemic inflammation-induced neuroinflammation by decreasing the blood-brain barrier's damage and regulating the microglia's polarization
Source: Research Square preprint supplement (doi:10.21203/rs.3.rs-2479732/v1), 2023-01-17
Supplement: Supplementary file 1 [file f12ac78acc58f564e72d0e33.docx]

**Antibodies and primers employed in this study**

**Table 1.**

List of primers used for quantitative real-time PCR.

| Name of genes | Forward primer (5′-3′) | Reverse primer (5′-3′) |
| --- | --- | --- |
| IL-1β | TACAGGCTCCGAGATGAACAAC | GCCACAGGTATTTTGTCGTT |
| IL-6 | TCCTACCCCAACTTCCAATGCTC | TTGGATGGTCTTGGTCCTTAGCC |
| IL-10 | CTCCCCTGTGAAAATAAGAGC | ATGGCCTTGTAGACACCTT |
| TNF-α | AGCACAGAAAGCATGATCCG | ATCACCCCGAAGTTCAGTAGACA |
| JAK2 | CATTCTTACCAAAGTGCGTTC | TCTGCGAAATCTGTACCTG |
| STAT3 | TTCCTGCAAGAGTCCAATGTCC | CTCTTCCCACAGGCATCGG |
| STAT6 | GATGAAGTCCTGCGAACCCTT | CAGACCCAGCAGGAATCGAAC |
| IRF8  MAC-1  BDNF  CCL2  CXCL10  CX3CL1  ZO1  Claudin-1  MMP9  ICAM1  VCAM1  PSD95  MAP2  PDGFRb  Claudin5 | AAGACCATGTTCCGTATCCCCT  GGAAATGCCTTCAACAAACCAC  AGAGAAAGTCCCGGTATCCAA  CAGTTAACGCCCCACTCAC  TTGAAATCATCCCTGCGAGCC  GACAAAGCCTGAATCCGCCACA  CGATCAAATCATTACGACCCT  CCGCTCAGGCCATCTACGA  ACACTAAAGGCCATTCGAACACC  TTCTTTTGCTCTGCCGCTCT  GCTCCAGACATTTACCCAGT  ATCGCCATCTTCATCCGTCCC  CTTCGGCTTATTAACCAACCAC  CTGCATATCCCCACGGCTGA  ACTGCCTTCCTGGACCACAAC | CAGAGCACAGCGTAACCTCGT  TTCAGGGCTTCAAAGTTGTCC  CCAGTGCCTTTTGTCTATGCC  CATTCCTTCTTGGGGTCAGC  AGGAGCCCTTTTAGACCTT  CCGTAAGCCCTGCATCCTGT  GCTCTCAAAACTTCTTCGGTCA  TTACCATCAAGGCTCGGGTT  TCATGTCTCGCGGCAAGTCT  CAAGCAGTCCGTCTCGTCCA  ATGTGTAATTTAGCTCGGCAA  CTCTTCAAAGCTGTCGCCCTC  GTTTAAAATCCTAACCTGACCCC  CGCACGTAGCCATTCTCGAT  CGCCAGCACAGATTCATACACCT |
| β-actin | CTGACCCTGAAGTACCCCAT | CATCTTTTCACGGTTGGCCTT |

**Table 2.**

Table of antibodies used.

| Antigen | Host species and clone | Conjugation | Source | Used concentration | Method |
| --- | --- | --- | --- | --- | --- |
| CD86 | Rabbit polyclonal |  | Bioss | 1:500 | WB |
| CD206 | Rabbit polyclonal |  | Proteintech | 1:500 |  |
| IRF8 | Rabbit polyclonal |  |  |  |  |
| NF-κB P65 | Rabbit polyclonal |  |  |  |  |
| p-NF-κB P65 | Rabbit polyclonal |  |  |  |  |
| p-JAK2 | Rabbit polyclonal |  | Affinity | 1:500 |  |
| STAT3 | Rabbit polyclonal |  |  |  |  |
| p-STAT3 | Rabbit polyclonal |  |  |  |  |
| Rabbit lgG(H+L) | Goat polyclonal | HRP | Proteintech | 1:1000 |  |
| iNOS | Rabbit polyclonal |  | Affinity | 1:200 | IHF |
| Arg1 | Rabbit polyclonal |  | Proteintech | 1:200 |  |
| Rabbit lgG(H+L) | Goat polyclonal | CoraLite488 | Proteintech | 1:1000 |  |
| CD86 | Rat monoclonal | PE | BD bioscience | 0.5 ug/test | FCM |
| CD206 | Rat monoclonal | Alexa Fluor 647 | Biolegend | 0.5 ug/test |  |
| CD45 | Rat monoclonal | PE |  | 0.25 ug/test |  |
| CD11b | Rat monoclonal | APC |  | 0.25 ug/test |  |
| Ly-6G | Rat monoclonal | Alexa Fluor 488 |  | 0.5 ug/test |  |
| CD45 | Rat monoclonal | APC |  | 0.25 ug/test |  |
| CD3 | Rat monoclonal | PE |  | 0.25 ug/test |  |
| CD19 | Rat monoclonal | FITC |  | 1 ug/test |  |
